# Supplementary material
Source: Research Square preprint supplement (doi:10.21203/rs.3.rs-8583101/v1)
Supplement: Supplementary file 1 [file 2b487fdb8f97033eed13004c.xlsx]

## Sheet: Table S1
References Used For DEG Identification
Qiang M, et al., Identification and validation of key genes associated with non-small-cell lung cancer. Journal of Cellular Physiology, 234, 12: 22742-22752 (2019). DOI: 10.1002/jcp.28839
Mengwei Ni et al. Identification of Candidate Biomarkers Correlated With the Pathogenesis and Prognosis of Non-small Cell Lung Cancer via Integrated Bioinformatics Analysis. Front. Genet., Sec. Computational Genomics. 9: 469 (2018). DOI: 10.3389/fgene.2018.00469
Ke W, et al. Identification of differentially expressed genes in non-small cell lung cancer. AGING, 11, 23: 11170-11185 (2019). DOI: 10.18632/aging.102521
Gong K, et al. Identification and Integrate Analysis of Key Biomarkers for Diagnosis and Prognosis of Non-Small Cell Lung Cancer Based on Bioinformatics Analysis. Technol Cancer Res Treat. 20:15330338211060202 (2021). DOI: 10.1177/15330338211060202.
Altaf R, Ilyas U, Ma A, Shi M. Identification and validation of differentially expressed genes for targeted therapy in NSCLC using integrated bioinformatics analysis. Front Oncol. 13,1206768 (2023). Erratum in: Front Oncol. (2024) 14.1377858. DOI: 10.3389/fonc.2023.1206768
Giannos P, Kechagias KS, Gal A. Identification of Prognostic Gene Biomarkers in Non-Small Cell Lung Cancer Progression by Integrated Bioinformatics Analysis. Biology. 10, 11:1200 (2021). DOI: 10.3390/biology10111200
Yang X et al. Identification of differentially expressed genes associated with lung adenocarcinoma via bioinformatics analysis. Gen Physiol Biophys. 40, 1:31-48 (2021). DOI: 10.4149/gpb_2020037.
Huang P, Gu Y, Guo L, Zou X, Yi L, Wu G. Bioinformatics Analysis and Screening of Potential Target Genes Related to the Lung Cancer Prognosis. Med Princ Pract. 34, 4:404 (2025). DOI: 10.1159/000533891
Wang Y et al. Identification of Significant Genes in Lung Cancer of Nonsmoking Women via Bioinformatics Analysis. Biomed Res Int. 2021:5516218 (2021). DOI: 10.1155/2021/5516218
Cai K et al. Identification of Potential Key Genes and Prognostic Biomarkers of Lung Cancer Based on Bioinformatics. Biomed Res Int. 2023:2152432 (2023). DOI: 10.1155/2023/2152432
Liu P et al. Identification of key genes and biological pathways in Chinese lung cancer population using bioinformatics analysis. PeerJ. 10:e12731 (2022). DOI: 10.7717/peerj.12731
Liu P, et al. Identification of key genes and biological pathways in Chinese lung cancer population using bioinformatics analysis. PeerJ, 10:e12731 (2022). DOI: 10.7717/peerj.12731.
Sultana A, et al. Single-cell RNA-seq analysis to identify potential biomarkers for diagnosis, and prognosis of non-small cell lung cancer by using comprehensive bioinformatics approaches. Transl Oncol. 27:101571 (2023). DOI: 10.1016/j.tranon.2022.101571
Bhattacharyya N, et al. CDK1 and HSP90AA1 Appear as the Novel Regulatory Genes in Non-Small Cell Lung Cancer: A Bioinformatics Approach. Journal of Personalized Medicine. 12, 3:393 (2022). DOI: 10.3390/jpm12030393
Çakmak, E. A Bioinformatics Approach to Identify Potential Biomarkers in Non-Small Cell Lung Cancer. Cumhuriyet Science Journal, 43, 1: 6-13 (2022). DOI: 10.17776/csj.976510
Erkin ÖC, Cömertpay B, Göv E. Integrative Analysis for Identification of Therapeutic Targets and Prognostic Signatures in Non-Small Cell Lung Cancer. Bioinform Biol Insights. 16:11779322221088796 (2022). DOI: 10.1177/11779322221088796.
Zhang JJ, et al. Identified GNGT1 and NMU as Combined Diagnosis Biomarker of Non-Small-Cell Lung Cancer Utilizing Bioinformatics and Logistic Regression. Dis Markers. 2021:6696198 (2021). DOI: 10.1155/2021/6696198.
Derakhshan NMH, et al. GPX2 and BMP4 as Significant Molecular Alterations in The Lung Adenocarcinoma Progression: Integrated Bioinformatics Analysis. Cell J. 24,6:302-308 (2022). DOI: 10.22074/cellj.2022.7930.
Xuan H, Peng R, Shaohua M. Bioinformatics analysis reveals three key genes and four survival genes associated with youth-onset NSCLC. Open Medicine, 17: 1123–1133 (2022). DOI: 10.1515/med-2022-0492.
Yu L, et al. Identification of Key Biomarkers and Candidate Molecules in Non-Small-Cell Lung Cancer by Integrated Bioinformatics Analysis. Genet Res (Camb). 2023:6782732 (2023). DOI: 10.1155/2023/6782732.
Li S, et al. Integrated bioinformatics analysis reveals CDK1 and PLK1 as potential therapeutic targets of lung adenocarcinoma. Medicine (Baltimore), 100, 32):e26474 (2021). DOI: 10.1097/MD.0000000000026474.
Rakibul I, et al. Identification of molecular biomarkers and pathways of NSCLC: insights from a systems biomedicine perspective, Journal of Genetic Engineering and Biotechnology, 19, 1:43 (2021). DOI: 10.1186/s43141-021-00134-1.
Wang Y, Zhou Z, Chen L, Li Z, Zhou Z, Chu X. Identification of key genes and biological pathways in lung adenocarcinoma via bioinformatics analysis. Mol Cell Biochem 476, 931–939 (2021). DOI: 10.1007/s11010-020-03959-5.
Mosharaf MP, Reza MS, Gov E, Mahumud RA, Mollah MNH. Disclosing Potential Key Genes, Therapeutic Targets and Agents for Non-Small Cell Lung Cancer: Evidence from Integrative Bioinformatics Analysis. Vaccines, 10, 5:771 (2022). DOI: 10.3390/vaccines10050771
Cui S, et al. Identification of genes and pathways leading to poor prognosis of non-small cell lung cancer using integrated bioinformatics analysis. Translational Cancer Research 11, 4 (2022). DOI: 10.21037/tcr-21-1986.
Ceylan, H. Identification and validation of key genes associated with smoking-induced lung adenocarcinoma development through bioinformatics analysis and predictions of small-molecule drugs. Cumhuriyet Science Journal, 42, 4: 751-757 (2021). DOI: 10.17776/csj.887810.
Zhang L,et al. Identification of key genes and biological pathways in lung adenocarcinoma by integrated bioinformatics analysis. World J Clin Cases. 11, 23:5504-5518 (2023). DOI: 10.12998/wjcc.v11.i23.5504.
Song Y, Tang W, Li H. Identification of KIF4A and its effect on the progression of lung adenocarcinoma based on the bioinformatics analysis. Biosci Rep. 41(1):BSR20203973 (2021). DOI: 10.1042/BSR20203973.
Xie H, Zhang JF, Li Q. Identification and analysis of genes associated with lung adenocarcinoma by integrated bioinformatics methods. Ann Hum Genet. 85, 3-4:125-137 (2021). DOI: 10.1111/ahg.12418.
Wang S, Xu X, Kong W. Identification of Hub Genes Associated with Lung Adenocarcinoma Based on Bioinformatics Analysis. Computational and Mathematical Methods in Medicine. 2021, 1:5550407 (2021). DOI: 10.1155/2021/5550407.
Lu M, et al. Identification of significant genes as prognostic markers and potential tumor suppressors in lung adenocarcinoma via bioinformatical analysis. BMC Cancer 21, 616 (2021). DOI: 10.1186/s12885-021-08308-3.
Wang H, Huang L, Chen L, Ji Jing, Zheng Y, Wang Z. Identification of Novel Biomarkers Related to Lung Squamous Cell Carcinoma Using Integrated Bioinformatics Analysis. Comput Math Methods Med. 2023:9780526 (2023). DOI: 10.1155/2023/9780526.
Zhao M, Li X, Chen X. GOLM1 predicts poor prognosis of patients with NSCLC and is associated with the proliferation and chemo‐sensitivity of cisplatin in NSCLC cells: bioinformatics analysis and laboratory validation. J Bioenerg Biomembr 53, 177–189 (2021). DOI: 10.1007/s10863-021-09875-7.
Guo Q, et al. Clinical Roles of Risk Model Based on Differentially Expressed Genes in Mesenchymal Stem Cells in Prognosis and Immunity of Non-small Cell Lung Cancer. Front. Genet. 13:823075 (2022). DOI: 10.3389/fgene.2022.823075.
Alipour M, Moghanibashi M, Naeimi S. Identification of Specific Genes for Adenocarcinoma and Squamous Cell of Lung Carcinoma by Bioinformatics Analysis. Research Square Preprint DOI: 10.21203/rs.3.rs-2569669/v1.
Alghamdi RA, Al-Zahrani MH. Integrated bioinformatics analyses identifying key transcriptomes correlated with prognosis and immune infiltrations in lung squamous cell carcinoma. Saudi Journal of Biological Sciences,30, 4:103596 (2023). DOI: 10.1016/j.sjbs.2023.103596
Zhu L, Gao S, Zhao X, Wang Y. Identification of biomarkers, pathways, and therapeutic targets for EGFR–TKI resistance in NSCLC. Life Science Alliance, 6, 12:e202302110 (2023). DOI: 10.26508/lsa.202302110 10.26508/lsa.202302110
Lai LT, et al. Identification and validation of novel prognostic biomarkers and therapeutic targets for non-small cell lung cancer. Front. Genet. 14:1139994 (2023) . DOI: 10.3389/fgene.2023.1139994.

## Sheet: Table S2
Upregulated DEG List
A2M
ABCA12
ABCC3
ABCC5
ABCE1
ABP1
ACRBP
ACTB
ACTL6A
ACTR2
ACY3
ADAM12
ADAM23
ADAM28
ADAMDEC1
ADC
ADCY4
ADH1B
ADH1C
ADM2
ADRB1
ADSSL1
AGER
AGMAT
AGO2
AGR2
AHCY
AHSP
AIF1
AIM1L
AIM2
AKR1B15
AKR1C1
AKR1C2
AKR1C3
AKR1C4
AKT1
ALAS2
ALDH18A1
ALDH1B1
ALDH3A1
ALDH3B2
ALDOA
ALDOB
ALPK2
ANAPC10
ANG
ANK3
ANKRD1
ANKRD22
ANLN
ANXA10
ARHGAP11A
ARHGEF16
ARHGEF39
ARNTL2
ASF1B
ASNS
ASPM
ATAD2
ATG9A
ATP10B
ATP4A
AUNIP
AURKA
AURKB
B3GALT5
B3GNT3
B3GNT4
B3GNT6
B4GALNT4
B4GALT2
B4GALT3
B4GALT4
BAG2
BAI1
BCL2L11
BCMO1
BHLHA15
BIK
BIRC5
BLM
BNIP3
BOP1
BRCA2
BRIP1
BUB1
BUB1B
C12orf56
C16orf59
C1GALT1
C1orf53
C2CD4A
C6orf10
CA1
CA4
CA9
CAD
CADPS
CALB1
CAMK2N2
CAPN8
CARD14
CBLC
CBS
CBX2
CCDC150
CCL5
CCNA2
CCNB1
CCNB2
CCNE1
CCNE2
CCR7
CD24
CD4
CD74
CD79A
CD79B
CDC20
CDC25A
CDC25C
CDC45
CDC6
CDC7
CDCA2
CDCA5
CDCA7
CDCA8
CDH1
CDH3
CDK1
CDK4
CDKN2A
CDKN3
CDT1
CEACAM5
CENPA
CENPE
CENPF
CENPI
CENPL
CENPN
CENPU
CEP55
CERCAM
CHAD
CHEK1
CHEK2
CHI3L1
CHRNA5
CHST4
CHST6
CKM
CKMT1A
CKMT1B
CKS2
CLDN18
CLDN2
CLIC5
CLIC6
CLSPN
CLU
CMC1
CNTNAP2
COCH
COL10A1
COL11A1
COL11A2
COL12A1
COL1A1
COL1A2
COL2A1
COL3A1
COL5A1
COL5A2
COL6A3
COMP
CP
CPA6
CPM
CPS1
CPT1C
CRABP2
CRLF1
CSF1R
CST1
CST2
CST3
CSTA
CTH
CTHRC1
CTSS
CXCL10
CXCL12
CXCL13
CXCL14
CXCL9
CXCR2
CYP11B1
CYP1B1
CYP24A1
CYP2A6
CYP2B6
CYP2C18
CYP2E1
CYP3A7
DBF4
DDR1
DDX21
DEFB103B
DEFB4A
DEPDC1
DEPDC1B
DGAT1
DGAT2
DIAPH3
DLGAP5
DMGDH
DNA2
DNMT1
DNMT3A
DNMT3B
DOCK4
DSC2
DSC3
DSG3
DSP
DTL
DUSP4
E2F1
E2F2
E2F3
E2F5
ECT2
EDARADD
EDNRB
EEF1A2
EFNA4
EGF
EGFR
EIF4EBP1
EME1
ENO1
ENO2
ENO3
EPCAM
EPRS
EPT1
ERBB2
ERC2
ERCC6L
ERO1A
ERO1L
ERVMER34-1
ESCO2
ESPL1
ESR1
ETV4
EXO1
EYA2
EZH2
FABP4
FAM107A
FAM111B
FAM72D
FAM83A
FAM83C
FANCI
FAP
FBXO45
FCN1
FCN3
FEN1
FERMT1
FGF2
FGFBP2
FGG
FHL2
FILIP1
FKBP2
FLRT3
FN1
FOS
FOXA3
FOXL2
FOXM1
FPR2
FRS2
FTL
FUT2
FUT3
FUT6
FUT8
FUT9
FYN
G2E3
G6PC
GAD1
GALNT14
GALNT3
GALNT4
GALNT6
GALNT7
GAMT
GAPDH
GAS6
GAST
GATA3
GBP6
GCAT
GCG
GCGR
GCNT3
GDA
GDF15
GFPT1
GFPT2
GINS1
GINS2
GJA4
GJB2
GJB6
GKN2
GLB1L3
GLDC
GMCL1
GMDS
GMPPA
GNG11
GNG4
GNGT1
GNLY
GOLM1
GOT1
GPI
GPM6A
GPNMB
GPR176
GPR87
GPT
GPT2
GPX2
GPX3
GPX4
GREM1
GRHL3
GRPR
GTSE1
GXYLT2
GZMB
H2AFZ
HABP2
HAVCR2
HBA1
HBA2
HBB
HBD
HBEGF
HCST
HELLS
HIST1H1B
HIST1H1D
HIST1H2AC
HIST1H2BD
HIST1H2BG
HIST1H2BI
HIST1H2BJ
HIST1H2BK
HIST1H3B
HIST1H3D
HIST2H3A
HIVEP1
HIVEP2
HJURP
HLA-F
HMGA1
HMGB3
HMMR
HN1
HNF1A
HNF4A
HNF4G
HOOK1
HOXA10
HOXA13
HOXC13
HOXC6
HOXC8
HOXD10
HOXD11
HRG
HS6ST2
HSD17B1
HSD17B2
HSD17B6
HSPD1
IBSP
ID2
IDO1
IGF2
IGF2BP3
IGFBP3
IGFL2
IGHD
IGHG1
IGLL5
IL10
IL11
IL1RAP
IL36G
IL36RN
IL4I1
IL6
INHBA
IRF7
ITGA11
ITGA2
ITGA5
ITGAM
ITGB3
ITGB4
ITGB8
ITPKA
JAKMIP3
JUN
KCNN4
KDELR3
KDM6B
KIAA0101
KIAA1549L
KIF11
KIF14
KIF15
KIF18A
KIF18B
KIF20A
KIF23
KIF26B
KIF2C
KIF4A
KLF7
KLK8
KLRB1
KNL1
KPNA2
KRT14
KRT15
KRT16
KRT19
KRT34
KRT5
KRT6A
KRT6B
KRT6C
KRT75
KRT79
KRTAP4-1
LAD1
LAMA1
LAMB1
LAMB3
LAMP5
LCE2A
LCE2C
LDHA
LDHB
LEPREL4
LGR4
LGSN
LHX2
LIG1
LMCD1
LMNB1
LRAT
LRDD
LRP8
LRRC15
LRRC31
LRRK2
LSR
LST1
LTB
LY6K
LYPD3
LYZ
MAD2L1
MAD2L2
MAP7D2
MAPK14
MASTL
MAT1A
MBOAT2
MCM10
MCM2
MCM3
MCM4
MCM6
MCM7
MDK
MEFV
MELK
MELTF
METTL1
METTL7B
MGLL
MGST1
MIF
MKI67
MMP1
MMP11
MMP12
MMP13
MMP3
MMP7
MMP9
MND1
MNDA
MNX1
MS4A1
MT1A
MT1X
MT2A
MTA3
MTMR7
MUC16
MYBL2
MYC
MYH11
MYL9
MYO19
MYOCD
MZF1
N4BP2
NAGA
NCAPG
NCAPH
NCKAP5
NDC80
NDUFA4L2
NEIL3
NEK2
NELL1
NETO2
NEUROD1
NFE2L3
NFYA
NFYB
NME1
NMU
NOC4L
NPR1
NPSR1
NPTX1
NQO1
NRGN
NUAK1
NUF2
NUSAP1
NXPH4
NXT1
OAT
OCIAD2
ODC1
OIP5
ORC1L
ORC6
ORC6L
P4HA1
P4HA3
P4HB
PAFAH1B3
PARPBP
PBK
PCDH19
PCK1
PCNA
PCP4
PCSK9
PDK1
PDX1
PERP
PF4
PFKP
PGAM2
PGF
PGLYRP4
PHLDA2
PIF1
PIK3R1
PIM1
PITX1
PITX2
PKM2
PKMYT1
PKP1
PLAC1
PLAU
PLEK2
PLK1
PLPP2
PLPP4
PMAIP1
PMEPA1
PMM2
PNCK
POLE
POLE2
POLQ
POU4F1
POU6F2
PPARG
PPAT
PPBP
PPP2R2C
PRAME
PRC1
PRDM13
PRF1
PRIM1
PRIM2
PRKDC
PROM1
PROM2
PRPF4
PRSS2
PSAT1
PSMD14
PSPH
PTBP3
PTHLH
PTK2
PTPN21
PTPRE
PTPRH
PTTG1
PTTG3P
PUS1
PXDC1
PYCARD
PYCR1
PYCRL
RAD51
RAD51AP1
RAD54B
RAD54L
RALGPS2
RBL1
RCOR2
RDH10
RDH5
RECQL4
RFC3
RFC4
RFC5
RGS17
RGS18
RGS20
RHOV
RNASEH2A
RREB1
RRM2
RTKN2
S100A12
S100A2
S100A6
S100A7
S100A9
S100P
SALL4
SAMD10
SAPCD2
SASH1
SCGB1A1
SDS
SERPINB5
SERPIND1
SERPINE1
SFN
SFTPC
SGO1
SGPP2
SH2D5
SHFM1
SHMT2
SIX1
SIX4
SKA1
SKA3
SKP2
SLC1A4
SLC2A1
SLC2A3
SLC4A4
SLC50A1
SLC52A3
SLC6A4
SLC7A11
SLITRK6
SMC1B
SMC4
SMCO2
SMPDL3B
SNX17
SORD
SOST
SOSTDC1
SP1
SPAG4
SPARC
SPC25
SPDEF
SPINK1
SPP1
SPRR1A
SPRR1B
SPRR2D
SPRR3
SPTBN2
SRD5A1
SRD5A3
SRM
ST6GALNAC1
STIL
STK32A
STXBP6
SULF1
SV2A
SYT12
TAC1
TAGLN2
TARS
TBP
TBX2
TCN1
TFAP2A
TFPI2
THBS2
THBS4
TICRR
TIMP1
TK1
TLCD1
TLR9
TMEM100
TMEM114
TMEM158
TMEM45B
TMEM63C
TMPO
TMPRSS4
TNC
TNFAIP2
TNFAIP6
TNFRSF17
TNFRSF21
TNNC1
TOM1
TOP2A
TOX3
TPI1
TPX2
TRAIP
TREML1
TRIM15
TRIM16L
TRIM17
TRIM2
TRIM22
TRIM29
TRIM45
TRIM58
TRIM59
TRIM72
TRIM9
TROAP
TSTA3
TTK
TUBB1
TUBB3
TYMS
TYROBP
UBA5
UBE2C
UBE2T
UCHL1
UGT1A10
UGT1A6
UGT1A9
UGT2B15
UGT2B4
UGT8
UHRF1
USF1
VCAN
VTN
VWA1
WDR72
WDR91
WFDC2
WIF1
WISP1
WNT3
XAGE1A
XDH
XRCC2
XRCC3
YTHDF1
ZFP64
ZIC2
ZIC5
ZNF263
ZNF697
ZNRD1
ZWINT

## Sheet: Table S3
Compound	Cultivar		Peel Concentration
Caffeic Acid	10.18178/ijfe.1.2.73-76	Manfalouty, Wardey	0.17 ug/mg, 0.22 ug/mg
	10.21608/jacb.2020.95837	not specified	0.955 ug/mg
Casuarinin	10.1248/bpb.16.787	not specified	6.47 ug/mg
Catechin	10.18178/ijfe.1.2.73-76	Manfalouty, Wardey	0.5 ug/mg, 0.277 ug/mg
	10.3390/life13030735	Zivzik	27.664 ug/mg
Chlorogenic Acid	10.18178/ijfe.1.2.73-76	Manfalouty, Wardey	4.93 ug/mg, 3.27 ug/mg
Corilagin	10.21608/jacb.2020.95837	not specified	6.67 ug/mg
Cyanidin	10.4067/S0718-58392016000400012	Lvbaoshi, Honbaoshi, Moshiliu	0.0079 ug/mg, 0.0246 ug/mg, 0.185 ug/mg
Delphinidin	10.4067/S0718-58392016000400012	Lvbaoshi, Honbaoshi, Moshiliu	0.0058 ug/mg, 0.00516 ug/mg, 0.1364 ug/mg
Ellagic Acid	10.4236/jct.2011.25085	Kabul	29.2 ug/mg
	10.21608/jacb.2020.95837	not specified	200 ug/mg
	10.18178/ijfe.1.2.73-76	Manfalouty, Wardey	0.12 ug/mg, 0.11 ug/mg
	10.21608/jacb.2020.95837	not specified	2.533 ug/mg
	10.3390/life13030735	Zivzik	199.967 ug/mg
Epicatechin	10.18178/ijfe.1.2.73-76	Manfalouty, Wardey	0.56 ug/mg, 0.477 ug/mg
	10.3390/life13030735	Zivzik	24.21 ug/mg
Epigallocatechin-3-gallate	10.3390/life13030735	Zivzik	25.6 ug/mg
Gallagyldilacton	10.21608/jacb.2020.95837	not specified	600 ug/mg
Gallic Acid	10.4236/jct.2011.25085	Kabul	52.1 ug/mg
	10.21608/jacb.2020.95837	not specified	4.33 ug/mg
	10.3390/life13030735	Zivzik	20.021 ug/mg
Granatin A	10.21608/jacb.2020.95837	not specified	13.3 ug/mg
Granatin B	10.21608/jacb.2020.95837	not specified	5.97 ug/mg
Kaempferol	10.1111/jfbc.12803	Wonderful	0.106 ug/mg
Luteolin	10.3390/life13030735	Zivzik	1.126 ug/mg
Naringerin	10.21608/ejaps.2023.246735.1076	not specified	0.249 ug/mg
Pedunculagin	10.21608/jacb.2020.95837	not specified	6.67 ug/mg
Pelargonidin	10.4067/S0718-58392016000400012	Lvbaoshi, Honbaoshi, Moshiliu	0.004 ug/mg, 0.014 ug/mg, 0.019 ug/mg
Punicalagin	10.21608/jacb.2020.95837	not specified	333.3 ug/mg
Punicalin	10.21608/jacb.2020.95837	not specified	26.6 ug/mg
Quercetin	10.4236/jct.2011.25085	Kabul	15.7 ug/mg
Rutin	10.3390/life13030735	Zivzik	2.732 ug/mg
Tellimagrandin	10.21608/jacb.2020.95837	not specified	43.56 ug/mg

## Sheet: Table S4
Target Protein	PDB ID	Reference
AHCY	1LI4
AKT1	4EJN
ALDOA	5KY6
CBS	4COO
CTSS	1NPZ
EGFR	1XKK
ESR1	1ERE
GPI	1IAT
MAPK14	1W84
MMP1	1HFC
MMP3	1B3D
MMP7	1MMR
MMP9	5TH6
MMP12	3F17
MMP13	4JPA
OAT	2OAT
PIK3R1	1H9O
PTK2	1MP8
SDS	1P5J
EGFR-T790M	5X2K
EGFR-L858R	5XDL
EGFR-ex19del	7TVD
EGFR-ex20ins	8PO0

## Sheet: Table S5
	AHCY	AKT1	ALDOA	CBS	CTSS	EGFR	ESR1	GPI	MAPK14	MMP1	MMP3	MMP7	MMP9	MMP12	MMP13	OAT	PIK3R1	PTK2	SDS
Caffeic acid	85.59 uM	60.57 uM		67.3 uM	3.57 mM	105.53 uM	130.41 uM	86.6 uM	234.45 uM	24.16 uM	157.25 uM		7.53 uM	125.48 uM		64.92 uM		872.92 uM	202.09 uM
Casuarinin		227.7 mM	2.94 mM		13.75 mM	27.09 mM	531.91 mM	17.61 mM	1.69 mM	2.95 mM	2.17 mM	5.98 mM	21.5 mM	3.44 mM	1.17 mM			69.69 mM	4.73 mM
Catechin	7.13 uM	4.82 uM	62.46 uM	2.77 uM	338.92 uM	32.15 uM	16.04 uM	95.04 uM	74.24 uM	14.21 uM	6.22 uM		47.78 uM	3.14 uM	3.58 uM	2.91 uM	533.5 uM		29.73 uM
Chlorogenic acid	4.53 uM	18.52 uM	58.34 uM	11.5 uM	277.71 uM	190.43 uM	15.77 uM	406.27 uM	82.54 uM		278.47 uM	93.57 uM	341.43 uM	1.68 uM	631.16 nM	3.33 uM		736.04 uM	14.14 uM
Corilagin	158.26 mM	8.04 mM	20.79 mM		335.78 uM	588.45 uM	17.42 mM	33.68 mM	3.61 mM		549.1 uM	133.74 uM	8.09 mM	19.12 mM	488.76 uM	112.65 mM		9.39 mM	9.24 mM
Cyanidin	2.59 uM	9.62 uM	477.91 uM	19.48 uM	293.4 uM	55.31 uM	26.61 uM	132.32 uM	85.13 uM	3.3 uM	11.96 uM	27.06 uM	20.1 uM	18.5 uM	1.89 uM	9.73 uM	355.37 uM		159.11 uM
Delphinidin	6.53 uM	4.79 uM	1.05 mM	13.62 uM	381.2 uM	42.56 uM	35.66 uM	92.46 uM	154.48 uM	30.97 uM	11.89 uM	86.36 uM	61.89 uM	9.21 uM	6.38 uM	4.86 uM	233.75 uM		158.47 uM
Ellagic acid	51.48 uM	12.64 uM		6.29 uM	423.53 uM	83.59 uM	19.24 uM	149.52 uM	437.78 uM	187.07 uM	812.68 uM	105.39 uM	203.1 uM	68.89 uM	140.33 uM	14.56 uM	148.49 uM	863.35 uM	77.27 uM
Epicatechin	21.44 uM	6.25 uM	120.06 uM	8.63 uM	231.98 uM	20.76 uM	5.91 uM	323.72 uM	54.94 uM	14.94 uM	36.4 uM		287.76 nM	1.25 uM	3.11 uM	4.25 uM	83.29 uM		51.71 uM
Epigallocatechin-3-gallate	317.98 uM	23.52 uM	473.58 uM	3.95 uM	912.95 uM	193.93 uM	2.37 mM	907.26 uM	76.61 uM		97.01 uM	344.38 uM	196.27 uM	233.88 uM	67.43 uM				597.63 uM
Gallagyldilacton	274.06 uM		27.21 uM		14.41 uM	743.12 nM	12.46 uM	16.4 uM		5.53 uM	296.28 nM	708.54 nM	10.29 uM	13.1 uM	3.41 uM			11.13 uM	4.91 uM
Gallic acid	120.91 uM	536.23 uM	156.47 uM	199.33 uM	2.25 mM			1.55 mM	293.96 uM	385.49 uM	187.55 uM	300.41 uM	297.77 uM	258.34 uM		120.79 uM	1.35 mM		361.52 uM
Granatin A		25.08 mM	778.24 uM		395.83 uM	426.61 uM	2.03 mM	450.83 uM	373.88 uM	588.03 uM	150.81 uM	1.64 mM	320.75 uM	216.48 uM	260.36 uM			8.03 mM	284.7 uM
Granatin B			6.06 mM		17.29 mM	52.7 mM	67.41 mM	2.52 mM	23.58 mM	635 uM	16.01 mM	7.82 mM	19.26 mM	100.74 mM	237.2 uM			22.57 mM	28.08 mM
Kaempferol	7.45 uM		300.98 uM	3.28 uM	278.55 uM	59.06 uM	21.44 uM	273.37 uM	92.44 uM	14.29 uM	31.22 uM		885.42 nM	7.03 uM	3.13 uM	5.95 uM	238.59 uM	317.07 uM	9.71 uM
Luteolin	23.43 uM	13.37 uM	154.94 uM	3.35 uM	126.88 uM	6.89 uM	4.88 uM	154.66 uM	96.53 uM	13.48 uM	16.29 uM	29.55 uM	597.8 nM	2.23 uM	2.54 uM	3.84 uM	247.65 uM	264.33 uM	1.11 uM
Naringerin	14.95 uM	821.81 nM	59.72 uM	6.08 uM	353.87 uM	1.17 uM	13.56 uM	31.12 uM	36.72 uM	8.97 uM	19.32 uM	19.59 uM	65.51 uM	91.2 nM	914.09 nM	21.04 nM			17.72 uM
Pedunculagin		4.4 uM	303.17 uM		20.67 mM	219.24 mM	9.97 mM	20.57 mM		2.88 mM	3.68 mM	3.32 mM	3.44 mM	9.65 mM	1.79 mM			8.66 mM	1.01 mM
Pelargonidin	3.32 uM			6.24 uM	143.59 uM	188.68 uM	18.35 uM	357.91 uM	64.94 uM	3.71 uM	32.36 uM		703.65 nM	5.58 uM	893.65 nM	12.61 uM
Punicalagin			104.1 mM		1.55 mM		25.47 uM	19.31 mM			22.94 mM	22.23 mM	68.01 mM	11.14 mM	10.66 mM
Punicalin		15.88 mM	2.02 mM		223.81 uM	12.9 mM	6.7 mM	4.11 mM	251.96 uM		1.34 mM	1.16 mM	2.26 mM	899.26 uM	1.18 mM			1.89 mM
Quercetin	16.86 uM	20.22 uM	449.09 uM	3 uM	367.7 uM	50.68 uM	23.25 uM	311.52 uM	218.28 uM	14.21 uM	61.7 uM		20.44 uM	10.28 uM	7.71 uM	3.95 uM	224.67 uM	978.27 uM	40.22 uM
Rutin	286.47 uM	24.78 uM	2.06 mM		532.49 uM	11.1 uM	12.99 mM	33.4 mM	15.88 mM		153.21 uM	3.49 mM	7.29 mM	339.04 uM	139.36 uM				441.61 uM
Tellimagrandin	121.5 mM	56 mM	4.2 mM		12.82 mM	56.2 mM		17.22 mM	1.12 mM		60.18 mM	69.36 mM	25.75 mM	142.28 mM	1.51 mM		34.68 mM	475.82 mM	196.63 mM

## Sheet: Table S6
Absorption			Distribution			Metabolism			Excretion			Toxicitiy
Model Name	Predicted Value	Unit	Model Name	Predicted Value	Unit	Model Name	Predicted Value	Unit	Model Name	Predicted Value	Unit	Model Name	Predicted Value	Unit
Water solubility	-2.892	log mol/L	VDss (human)	-0.1	log L/kg	CYP2D6 substrate	no	yes/no	Total clearance	0.729	log ml/min/kg	AMES toxicity	no	yes/no
Caco2 permeability	0.739	log Papp in 10^-6 cm/s	Fraction unbound (human	0.387	Fu	CYP3A4 substrate	no	yes/no	Renal OCT2 substrate	no	yes/no	Max. tolerated dose (human)	0.437	log mg/kg/day
Intestinal absorption (human)	75.543	% absorbed	BBB permeability	-2.707	log BB	CYP1A2 inhibitor	no	yes/no				hERG I inhibitor	no	yes/no
Skin permeability	-2.735	log Kp	CNS	-5.156	log PS	CYP2C19 inhibitor	no	yes/no				hERG II inhibitor	yes	yes/no
P-glycoprotein substrate	yes	yes/no				CYP2C9 inhibitor	no	yes/no				Oral Rat Acute Toxicity (LD50)	2.482	mol/kg
P-glycoprotein I inhibitor	no	yes/no				CYP2D6 inhibitor	no	yes/no				Oral Rat Chronic Toxicity (LOAEL)	4.169	log mg/kg_bw/day
P-glycoprotein II inhibitor	yes	yes/no				CYP3A4 inhibitor	no	yes/no				Hepatotoxicity	no	yes/no
												Skin sensitisation	no	yes/no
												T. pyriformis toxicity	0.285	log ug/L
												Minnow toxicity	5.165	log mM
